# Supplementary material for: Psychiatric Disorders in the Adolescent Offspring of Mothers with Thyroid Problems During Pregnancy
Source: Springer Nature journal article supplement (doi:10.1007/s10578-020-00957-y), 2020-02-01
Supplement: MOESM1 [file 17615288]

Supplementary Table 1: Moderation effect of gestational age at delivery upon maternal thyroid problems to predict MINI-KID diagnosis

| **Youth MINI** | **OR (95% CI)** |
| --- | --- |
| Major Depressive Disorder | 1.20 (0.66-2.20) |
| Social Phobia | 1.24 (0.85-1.82) |
| Specific phobia | 0.88 (0.68-1.15) |
| Generalized Anxiety Disorder | 1.04 (0.75-1.44) |
| Separation Anxiety Disorder | 0.46 (0.18-1.18) |
| ADHD | 0.93 (0.58-1.47) |
| Conduct | 1.05 (0.55-1.83) |
| ODD | 1.00 (0.56-1.80) |

aAnalyses were adjusted for sex, birthweight, socioeconomic status, maternal age at birth, and maternal mental health

Supplementary Table 2: Moderation effect of sex upon maternal thyroid problems to predict MINI-KID diagnosis

| **Youth MINI** | **OR (95% CI)** |
| --- | --- |
| Major Depressive Disorder | **0.06 (0.01-0.92)*** |
| Social Phobia | Insufficient cases |
| Specific phobia | 0.31 (0.05-1.93) |
| Generalized Anxiety Disorder | 1.13 (0.24-5.32) |
| Separation Anxiety Disorder | 0.04 (0.01-6.40) |
| ADHD | 2.11 (0.27-16.83) |
| Conduct | Insufficient cases |
| ODD | 5.84 (0.72-47.56) |

*denotes a statistically-significant interaction effect between thyroid problems and sex.

aAnalyses were adjusted for birthweight, socioeconomic status, maternal age at birth, and maternal mental health

Supplementary Table 3: Stratified interaction of sex and maternal thyroid problems to predict Major Depressive Disorder diagnosis.

| **Youth MINI** | **Male** | **Female** |
| --- | --- | --- |
| **OR (95% CI)** | **OR (95% CI)** |
| Major Depressive Disorder | 5**.33 (1.53-18.52)*** | 0.32 (0.03-3.40) |

*denotes a statistically-significant interaction effect between thyroid problems and sex.

aAnalyses were adjusted for birthweight, socioeconomic status, maternal age at birth, and maternal mental health

Supplementary Table 4: Mediation effect of school performance upon the association between maternal thyroid problems and MINI-KID diagnosis

|  | **Beta** | **SE** | **95% CI** | | **% Mediated** |
| --- | --- | --- | --- | --- | --- |
| Social Phobia | 0.01 | 0.00 | 0.01 | 0.02 | **8%*** |
| Conduct Disorder | 0.02 | 0.01 | 0.01 | 0.03 | **21%*** |
| Oppositional Defiant Disorder | 0.02 | 0.00 | 0.01 | 0.03 | **53%*** |
| Generalized Anxiety Disorder | 0.01 | 0.00 | 0.01 | 0.02 | **21%*** |

*denotes a statistically-significant interaction effect between thyroid problems and gestational age.
